# Supplementary material for: Ideal nodal-net, nodal-chain, and nodal-cage phonons in some realistic materials
Source: Royal Society of Chemistry journal article supplement (doi:10.1039/d2cp00731b), 2022-01-01
Supplement: d2cp00731b1.pdf [file d2cp00731b1.pdf]

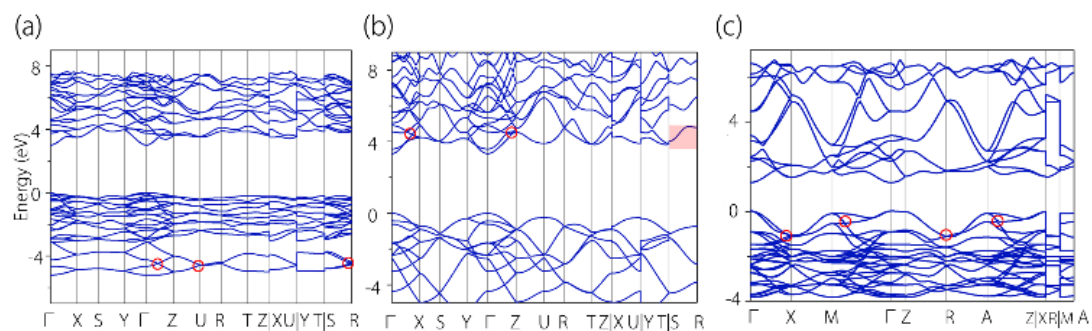

FIG. S1 (a)-(c) The band structures for  $\text{LiAlSe}_2$ ,  $\text{NaMgH}_3$  and  $\text{AuBr}$ , respectively. SOC is not taken into consideration. The crossing points are highlighted by red circles. The DNL along the S-R path in (b) is shown with red background.
